# Supplementary material for: Response of the carbon cycle in an intermediate complexity model to the different climate configurations of the last nine interglacials
Source: Copernicus journal article supplement (doi:10.5194/cp-14-239-2018), 2018-03-02
Supplement: Supplementary file 1 [file Model_data_description.doc]

Supplementary data

output_AMOC_OC.txt : Atlantic Meridional overturning circulation (Sv) in the OC simulations

output_AMOC_OVC.txt: Atlantic Meridional overturning circulation (Sv) in the OVC simulations

output_AMOC_OVIC.txt: Atlantic Meridional overturning circulation (Sv) in the OVIC simulations

output_carbon.txt : simulated CO2 (ppm), ocean carbon stocks and land carbon stocks (GtC) in the simulations

output_carbon_stock_OVC.txt : carbon storage (kgC/m²) in the OVC simulations

output_carbon_stock_OVIC.txt : carbon storage (kgC/m²) in the OVIC simulations

output_DIC_OC.txt : Dissolved inorganic carbon (μmol/kg) in the OC simulations

output_DIC_OVC.txt: Dissolved inorganic carbon (μmol/kg) in the OVC simulations

output_surface_ST_OC.txt : annual SST (°C) in the OC simulations

output_surface_ST_OVC.txt : annual SST (°C) in the OVC simulations

output_surface_ST_OVIC.txt : annual SST (°C) in the OVIC simulations

output_tree_cover_OVC.txt : tree cover (%) in the OVC simulations

output_tree_cover_OVIC.txt : tree cover (%) in the OVIC simulations
