# Supplementary material for: Response of the carbon cycle in an intermediate complexity model to the different climate configurations of the last nine interglacials
Source: Copernicus journal article supplement (doi:10.5194/cp-14-239-2018), 2018-03-02
Supplement: Supplementary file [file cp-14-239-2018-supplement-title-page.pdf › cp-14-239-2018-supplement-title-page.pdf]

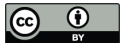

## *Supplement of*

# **Response of the carbon cycle in an intermediate complexity model to the different climate configurations of the last nine interglacials**

**Nathaelle Bouttes et al.**

*Correspondence to:* Nathaelle Bouttes ([nathaelle.bouttes@lsce.ipsl.fr](mailto:nathaelle.bouttes@lsce.ipsl.fr))

- cp-14-239-2018-supplement-title-page.pdf
- Model\_data\_description.doc
- output\_AMOC\_OC.txt
- output\_AMOC\_OVC.txt
- output\_AMOC\_OVIC.txt
- output\_DIC\_OC.txt
- output\_DIC\_OVC.txt
- output\_carbon.txt
- output\_carbon\_stock\_OVC.txt
- output\_carbon\_stock\_OVIC.txt
- output\_surface\_ST\_OC.txt
- output\_surface\_ST\_OVC.txt
- output\_surface\_ST\_OVIC.txt
- output\_tree\_cover\_OVC.txt
- output\_tree\_cover\_OVIC.txt

The copyright of individual parts of the supplement might differ from the CC BY 3.0 License.
